# Supplementary material for: Structural and Functional insights into the catalytic mechanism of the Type II NADH:quinone oxidoreductase family
Source: PubMed Central journal article supplement (PMC5299459; doi:10.1038/srep42303), 2017-02-09
Supplement: srep42303-s1.pdf [file srep42303-s1.pdf]

## Supplementary information

Structural and Functional insights into the catalytic mechanism of the Type II NADH:quinone oxidoreductase family

Bruno C. Marreiros<sup>1</sup>, Filipa V. Sena<sup>1</sup>, Filipe M. Sousa<sup>1</sup>, A. Sofia F. Oliveira<sup>1</sup>, Cláudio M. Soares<sup>1</sup>, Ana P. Batista<sup>1,2</sup> and Manuela M. Pereira<sup>1\*</sup>

1- Instituto de Tecnologia Química e Biológica – António Xavier, Universidade Nova de Lisboa, Av. da Republica EAN, 2780-157 Oeiras, Portugal

2- Current address: iBET, Instituto de Biologia Experimental e Tecnológica, apartado 12, 2780-901 Oeiras, Portugal

\*Corresponding author. Telephone: +351-214469312. Fax: +351-214469314; E-mail: mpereira@itqb.unl.pt.

**Supplementary Table 1: Simulated pH titrations of NDH-2 from *S. aureus*.** Calculated protonated fractions for the different amino acid residues of NDH-2 from *S. aureus* at different pHs for: A) oxidized state of the protein (FAD); B) reduced state of the protein (FADH<sub>2</sub>); C) Variation of the protonated fraction between FAD and FADH<sub>2</sub> states for each amino acid residue. For the first two panels the blue-red scale represents the protonated fraction from 0 % (blue) to 100 % (red). For panel C) blue represents a negative variation and red a positive variation of the protonated fraction between FAD and FADH<sub>2</sub> states. At pH 7, the three residues that appear to suffer the highest variation upon FAD reduction and protonation are E<sub>172</sub> (25 %), E<sub>176</sub> (-12 %) and H<sub>51</sub> (3 %).

| Proton occupancy (%)          |      | A          |      |      |      |      |      |                   | B                 |                   |                   |                   |                   |                                                    | C   |     |     |      |     |   |
|-------------------------------|------|------------|------|------|------|------|------|-------------------|-------------------|-------------------|-------------------|-------------------|-------------------|----------------------------------------------------|-----|-----|-----|------|-----|---|
|                               |      | pH         |      |      |      |      |      |                   | pH                |                   |                   |                   |                   |                                                    | pH  |     |     |      |     |   |
|                               |      | Amino acid | 4    | 5    | 6    | 7    | 8    | 9                 | 4                 | 5                 | 6                 | 7                 | 8                 | 9                                                  | 4   | 5   | 6   | 7    | 8   | 9 |
|                               |      | FAD        | FAD  | FAD  | FAD  | FAD  | FAD  | FADH <sub>2</sub> | FADH <sub>2</sub> | FADH <sub>2</sub> | FADH <sub>2</sub> | FADH <sub>2</sub> | FADH <sub>2</sub> | Variation between FAD and FADH <sub>2</sub> states |     |     |     |      |     |   |
|                               |      |            |      |      |      |      |      |                   |                   |                   |                   |                   |                   | 0%                                                 | 0%  | 0%  | 0%  | 0%   | 0%  |   |
|                               | YD   | D103       | 14%  | 2%   | 0%   | 0%   | 0%   | 14%               | 2%                | 0%                | 0%                | 0%                | 0%                | 0%                                                 | 0%  | 0%  | 0%  | 0%   | 0%  |   |
|                               | GD   | D302       | 93%  | 76%  | 40%  | 12%  | 3%   | 92%               | 77%               | 40%               | 11%               | 2%                | 0%                | 1%                                                 | -1% | 0%  | 0%  | 1%   | 0%  |   |
| 2nd Proton conductive pathway | H51  | H51        | 15%  | 15%  | 12%  | 10%  | 5%   | 30%               | 19%               | 11%               | 7%                | 3%                | 1%                | -15%                                               | -5% | 1%  | 3%  | 2%   | 1%  |   |
|                               | E52  | E52        | 0%   | 0%   | 0%   | 0%   | 0%   | 1%                | 0%                | 0%                | 0%                | 0%                | 0%                | 0%                                                 | 0%  | 0%  | 0%  | 0%   | 0%  |   |
|                               | E172 | E172       | 78%  | 65%  | 45%  | 32%  | 16%  | 43%               | 24%               | 11%               | 7%                | 3%                | 1%                | 35%                                                | 41% | 34% | 25% | 14%  | 3%  |   |
|                               | E176 | E176       | 96%  | 91%  | 75%  | 52%  | 26%  | 96%               | 93%               | 85%               | 64%               | 28%               | 5%                | 0%                                                 | 0%  | -2% | -9% | -12% | -2% |   |
|                               | D179 | D179       | 11%  | 3%   | 1%   | 0%   | 0%   | 12%               | 3%                | 1%                | 0%                | 0%                | 0%                | -1%                                                | -1% | 0%  | 0%  | 0%   | 0%  |   |
|                               | E183 | E183       | 43%  | 11%  | 2%   | 0%   | 0%   | 44%               | 12%               | 2%                | 0%                | 0%                | 0%                | -1%                                                | -1% | 0%  | 0%  | 0%   | 0%  |   |
| 1st Proton conductive pathway | K23  | K23        | 100% | 100% | 100% | 99%  | 96%  | 100%              | 100%              | 100%              | 99%               | 95%               | 81%               | 0%                                                 | 0%  | 0%  | 0%  | 0%   | 0%  |   |
|                               | E327 | E327       | 0%   | 0%   | 0%   | 0%   | 0%   | 0%                | 0%                | 0%                | 0%                | 0%                | 0%                | 0%                                                 | 0%  | 0%  | 0%  | 0%   | 0%  |   |
|                               | K331 | K331       | 100% | 100% | 100% | 100% | 98%  | 100%              | 100%              | 100%              | 100%              | 97%               | 86%               | 0%                                                 | 0%  | 0%  | 0%  | 0%   | -1% |   |
|                               | K389 | K389       | 100% | 100% | 99%  | 95%  | 73%  | 100%              | 100%              | 99%               | 95%               | 72%               | 28%               | 0%                                                 | 0%  | 0%  | 0%  | 1%   | 2%  |   |
|                               | H44  | H44        | 97%  | 89%  | 64%  | 24%  | 5%   | 97%               | 90%               | 66%               | 25%               | 5%                | 1%                | 0%                                                 | 0%  | -1% | -2% | -1%  | 0%  |   |
| connection                    | E46  | E46        | 1%   | 1%   | 0%   | 0%   | 0%   | 1%                | 1%                | 0%                | 0%                | 0%                | 0%                | 0%                                                 | 0%  | 0%  | 0%  | 0%   | 0%  |   |
|                               | K379 | K379       | 100% | 100% | 100% | 100% | 100% | 100%              | 100%              | 100%              | 100%              | 100%              | 100%              | 0%                                                 | 0%  | 0%  | 0%  | 0%   | 0%  |   |
| others                        | D383 | D383       | 0%   | 0%   | 0%   | 0%   | 0%   | 0%                | 0%                | 0%                | 0%                | 0%                | 0%                | 0%                                                 | 0%  | 0%  | 0%  | 0%   | 0%  |   |
|                               | Y15  | Y15        | 100% | 100% | 100% | 100% | 100% | 100%              | 100%              | 100%              | 100%              | 100%              | 100%              | 0%                                                 | 0%  | 0%  | 0%  | 0%   | 0%  |   |

**Supplementary Table 2: Distances between the amino acid residues composing the proton pathway in the second dinucleotide binding domain present in the three NDH-2s with known structures: A) *S. aureus*; B) *S. cerevisiae*; C) *C. thermarum*.** Analyzing the X-ray crystallographic structures available of the three NDH-2s, we have observed the following combinations: in *S. aureus* (PDB:4XDB), E<sub>183</sub> to D<sub>179</sub> (6.2 Å, at the surface), D<sub>179</sub> to backbone of S<sub>358</sub> (3.3 Å), backbone of S<sub>358</sub> to E<sub>176</sub> (4.1 Å), E<sub>176</sub> to S<sub>355</sub> (3.5 Å), S<sub>355</sub> to H<sub>51</sub> (2.2 Å) and H<sub>51</sub> to E<sub>172</sub> (3.7 Å); in *C. thermarum* (PDB:4NWX), E<sub>180</sub> to D<sub>176</sub> (9.6 Å, at the surface), D<sub>176</sub> to E<sub>173</sub> (5.4 Å), E<sub>173</sub> to R<sub>355</sub> (1.8 Å), R<sub>355</sub> to H<sub>49</sub> (3.1 Å) and H<sub>49</sub> to E<sub>169</sub> (3.8 Å); and in *S. cerevisiae* (PDB: 4G73), D<sub>254</sub> to R<sub>507</sub> (2.0 Å, at the surface), R<sub>507</sub> to D<sub>249</sub> (3.8 Å) and D<sub>249</sub> to Y<sub>449</sub> (2.4 Å). Y<sub>449</sub> is at 5.2 Å from E<sub>246</sub> and at 9.4 Å from E<sub>242</sub>, and may work as the functional replacement for X<sub>51</sub>, since in NDH-2 from *S. cerevisiae* (and most of eukaryotic NDH-2s) an equivalent to H<sub>51</sub> is not present to connect the last two glutamate residues (E<sub>242</sub> and E<sub>246</sub>). This connection could be hypothesized to be performed under a rotamer change state of Y<sub>449</sub> (corresponding to S<sub>355</sub> in *S. aureus*); or conformational changes at S<sub>96</sub> (corresponding to E<sub>52</sub> in *S. aureus*) since there are two proline residues before that could unwind  $\alpha$ -helix 2 and move S<sub>96</sub> closer to E<sub>242</sub>; or by the presence of a structural water molecule, which curiously is observed between P<sub>95</sub>, E<sub>242</sub> and E<sub>246</sub> residues in both NDH-2 structures of *S. cerevisiae*<sup>1-2</sup>.

| <i>S. aureus</i> |              | <i>S. cerevisiae</i> |              | <i>C. thermarum</i> |              |
|------------------|--------------|----------------------|--------------|---------------------|--------------|
| residues         | distance (Å) | residues             | distance (Å) | residues            | distance (Å) |
| E183 → D179      | 6.2          | D254 → R507          | 2.0          | E180 → D176         | 9.6          |
| D179 → S358      | 3.3          | R507 → D249          | 3.8          | D176 → E173         | 5.4          |
| S358 → E176      | 4.1          | D249 → Y449          | 2.4          | E173 → R355         | 1.8          |
| E176 → S355      | 3.5          | Y449 → E246          | 5.2          | R355 → H49          | 3.1          |
| S355 → H51       | 2.2          | Y449 → E242          | 9.4          | H49 → E169          | 3.8          |
| H51 → E172       | 3.7          |                      |              |                     |              |

**Supplementary Table 3: Simulated pH titrations of NDH-2 from *S. cerevisiae*.** Calculated protonated fractions for the different amino acid residues from NDH-2 from *S. cerevisiae* at different pHs for: A) oxidized state of the protein (FAD); B) reduced state of the protein (FADH<sub>2</sub>); C) Variation of the protonated fraction between FAD and FADH<sub>2</sub> states for each amino acid residue; D) oxidized state of the protein (FAD); E) reduced state of the protein with bound NAD<sup>+</sup> (FADH<sub>2</sub>-NAD<sup>+</sup>); F) Variation of the protonated fraction between FAD and FADH<sub>2</sub>-NAD<sup>+</sup> states for each amino acid residue. For panels A), B), D) and E) blue-red scale represents the protonated fraction from 0 % (blue) to 100 % (red). For panels C) and F) blue represents a negative variation and red a positive variation of the protonated fraction between FAD and FADH<sub>2</sub> states and FAD and FADH<sub>2</sub>-NAD<sup>+</sup> respectively. At pH 5, the three residues that appear to suffer the highest variation upon FAD reduction and protonation (with bound NAD<sup>+</sup>) are E<sub>242</sub> (34 %), E<sub>246</sub> (-2 %) and D<sub>383</sub> (-31 %).

**A**

pH

|                               | Amino acid | pH   |      |      |      |      |      |
|-------------------------------|------------|------|------|------|------|------|------|
|                               |            | 4    | 5    | 6    | 7    | 8    | 9    |
| YD                            | Y169       | 100% | 100% | 100% | 100% | 100% | 100% |
|                               | D170       | 39%  | 12%  | 2%   | 0%   | 0%   | 0%   |
| GD                            | D383       | 65%  | 38%  | 20%  | 7%   | 1%   | 0%   |
| 2nd Proton conductive pathway | E242       | 55%  | 35%  | 12%  | 3%   | 0%   | 0%   |
|                               | E246       | 29%  | 18%  | 6%   | 2%   | 0%   | 0%   |
|                               | D249       | 0%   | 0%   | 0%   | 0%   | 0%   | 0%   |
|                               | D254       | 10%  | 2%   | 0%   | 0%   | 0%   | 0%   |
|                               | Y449       | 100% | 100% | 100% | 100% | 100% | 100% |
| 1st Proton conductive pathway | H71        | 86%  | 60%  | 32%  | 10%  | 2%   | 0%   |
|                               | D73        | 0%   | 0%   | 0%   | 0%   | 0%   | 0%   |
|                               | H397       | 87%  | 68%  | 47%  | 18%  | 3%   | 0%   |
|                               | E401       | 5%   | 1%   | 0%   | 0%   | 0%   | 0%   |
|                               | K405       | 100% | 100% | 99%  | 96%  | 84%  | 68%  |
| D408                          | 9%         | 1%   | 0%   | 0%   | 0%   | 0%   |      |
| connection                    | Y482       | 100% | 100% | 100% | 100% | 100% | 100% |
| QBS                           | E399       | 91%  | 78%  | 57%  | 22%  | 3%   | 0%   |

**B**

pH

| pH                |                   |                   |                   |                   |                   |                   |
|-------------------|-------------------|-------------------|-------------------|-------------------|-------------------|-------------------|
| 4                 | 5                 | 6                 | 7                 | 8                 | 9                 |                   |
| FADH <sub>2</sub> | FADH <sub>2</sub> | FADH <sub>2</sub> | FADH <sub>2</sub> | FADH <sub>2</sub> | FADH <sub>2</sub> | FADH <sub>2</sub> |
| 100%              | 100%              | 100%              | 100%              | 100%              | 100%              | 100%              |
| 40%               | 12%               | 2%                | 0%                | 0%                | 0%                | 0%                |
| 63%               | 37%               | 17%               | 5%                | 1%                | 0%                | 0%                |
| 36%               | 18%               | 5%                | 1%                | 0%                | 0%                | 0%                |
| 36%               | 22%               | 6%                | 1%                | 0%                | 0%                | 0%                |
| 0%                | 0%                | 0%                | 0%                | 0%                | 0%                | 0%                |
| 10%               | 2%                | 0%                | 0%                | 0%                | 0%                | 0%                |
| 100%              | 100%              | 100%              | 100%              | 100%              | 100%              | 100%              |
| 86%               | 60%               | 32%               | 10%               | 2%                | 0%                | 0%                |
| 0%                | 0%                | 0%                | 0%                | 0%                | 0%                | 0%                |
| 87%               | 68%               | 46%               | 16%               | 3%                | 1%                | 0%                |
| 4%                | 1%                | 0%                | 0%                | 0%                | 0%                | 0%                |
| 100%              | 100%              | 99%               | 96%               | 85%               | 68%               | 0%                |
| 9%                | 2%                | 0%                | 0%                | 0%                | 0%                | 0%                |
| 100%              | 100%              | 100%              | 100%              | 100%              | 100%              | 100%              |
| 90%               | 77%               | 56%               | 22%               | 3%                | 0%                | 0%                |

**C**

pH

| pH                                                 |     |    |    |     |    |    |
|----------------------------------------------------|-----|----|----|-----|----|----|
| 4                                                  | 5   | 6  | 7  | 8   | 9  |    |
| Variation between FAD and FADH <sub>2</sub> states |     |    |    |     |    |    |
| 0%                                                 | 0%  | 0% | 0% | 0%  | 0% | 0% |
| -1%                                                | 0%  | 0% | 0% | 0%  | 0% | 0% |
| 2%                                                 | 1%  | 3% | 2% | 0%  | 0% | 0% |
| 19%                                                | 17% | 7% | 1% | 0%  | 0% | 0% |
| -7%                                                | -3% | 0% | 0% | 0%  | 0% | 0% |
| 0%                                                 | 0%  | 0% | 0% | 0%  | 0% | 0% |
| 0%                                                 | 0%  | 0% | 0% | 0%  | 0% | 0% |
| 0%                                                 | 0%  | 0% | 0% | 0%  | 0% | 0% |
| 0%                                                 | 0%  | 0% | 0% | 0%  | 0% | 0% |
| 0%                                                 | 0%  | 1% | 2% | 0%  | 0% | 0% |
| 0%                                                 | 0%  | 0% | 0% | 0%  | 0% | 0% |
| 0%                                                 | 0%  | 0% | 0% | -1% | 0% | 0% |
| 0%                                                 | 0%  | 0% | 0% | 0%  | 0% | 0% |
| 0%                                                 | 0%  | 0% | 0% | 0%  | 0% | 0% |
| 0%                                                 | 1%  | 1% | 1% | 0%  | 0% | 0% |

**D**

pH

|                               | Amino acid | pH   |      |      |      |      |      |
|-------------------------------|------------|------|------|------|------|------|------|
|                               |            | 4    | 5    | 6    | 7    | 8    | 9    |
| YD                            | Y169       | 100% | 100% | 100% | 100% | 100% | 100% |
|                               | D170       | 39%  | 12%  | 2%   | 0%   | 0%   | 0%   |
| GD                            | D383       | 65%  | 38%  | 20%  | 7%   | 1%   | 0%   |
| 2nd Proton conductive pathway | E242       | 55%  | 35%  | 12%  | 3%   | 0%   | 0%   |
|                               | E246       | 29%  | 18%  | 6%   | 2%   | 0%   | 0%   |
|                               | D249       | 0%   | 0%   | 0%   | 0%   | 0%   | 0%   |
|                               | D254       | 10%  | 2%   | 0%   | 0%   | 0%   | 0%   |
|                               | Y449       | 100% | 100% | 100% | 100% | 100% | 100% |
| 1st Proton conductive pathway | H71        | 86%  | 60%  | 32%  | 10%  | 2%   | 0%   |
|                               | D73        | 0%   | 0%   | 0%   | 0%   | 0%   | 0%   |
|                               | H397       | 87%  | 68%  | 47%  | 18%  | 3%   | 0%   |
|                               | E401       | 5%   | 1%   | 0%   | 0%   | 0%   | 0%   |
|                               | K405       | 100% | 100% | 99%  | 96%  | 84%  | 68%  |
| D408                          | 9%         | 1%   | 0%   | 0%   | 0%   | 0%   |      |
| connection                    | Y482       | 100% | 100% | 100% | 100% | 100% | 100% |
| QBS                           | E399       | 91%  | 78%  | 57%  | 22%  | 3%   | 0%   |

**E**

pH

| pH                                  |                                     |                                     |                                     |                                     |                                     |                                     |
|-------------------------------------|-------------------------------------|-------------------------------------|-------------------------------------|-------------------------------------|-------------------------------------|-------------------------------------|
| 4                                   | 5                                   | 6                                   | 7                                   | 8                                   | 9                                   |                                     |
| FADH <sub>2</sub> -NAD <sup>+</sup> | FADH <sub>2</sub> -NAD <sup>+</sup> | FADH <sub>2</sub> -NAD <sup>+</sup> | FADH <sub>2</sub> -NAD <sup>+</sup> | FADH <sub>2</sub> -NAD <sup>+</sup> | FADH <sub>2</sub> -NAD <sup>+</sup> | FADH <sub>2</sub> -NAD <sup>+</sup> |
| 100%                                | 100%                                | 100%                                | 100%                                | 100%                                | 100%                                | 100%                                |
| 40%                                 | 12%                                 | 2%                                  | 0%                                  | 0%                                  | 0%                                  | 0%                                  |
| 89%                                 | 69%                                 | 45%                                 | 21%                                 | 4%                                  | 1%                                  | 0%                                  |
| 2%                                  | 1%                                  | 0%                                  | 0%                                  | 0%                                  | 0%                                  | 0%                                  |
| 46%                                 | 21%                                 | 5%                                  | 1%                                  | 0%                                  | 0%                                  | 0%                                  |
| 0%                                  | 0%                                  | 0%                                  | 0%                                  | 0%                                  | 0%                                  | 0%                                  |
| 10%                                 | 2%                                  | 0%                                  | 0%                                  | 0%                                  | 0%                                  | 0%                                  |
| 100%                                | 100%                                | 100%                                | 100%                                | 100%                                | 100%                                | 100%                                |
| 86%                                 | 60%                                 | 33%                                 | 10%                                 | 2%                                  | 0%                                  | 0%                                  |
| 0%                                  | 0%                                  | 0%                                  | 0%                                  | 0%                                  | 0%                                  | 0%                                  |
| 86%                                 | 65%                                 | 43%                                 | 15%                                 | 3%                                  | 0%                                  | 0%                                  |
| 5%                                  | 1%                                  | 0%                                  | 0%                                  | 0%                                  | 0%                                  | 0%                                  |
| 100%                                | 100%                                | 99%                                 | 96%                                 | 85%                                 | 68%                                 | 0%                                  |
| 9%                                  | 2%                                  | 0%                                  | 0%                                  | 0%                                  | 0%                                  | 0%                                  |
| 100%                                | 100%                                | 100%                                | 100%                                | 100%                                | 100%                                | 100%                                |
| 91%                                 | 75%                                 | 51%                                 | 24%                                 | 5%                                  | 1%                                  | 0%                                  |

**F**

pH

| pH                                                 |      |      |      |     |    |    |
|----------------------------------------------------|------|------|------|-----|----|----|
| 4                                                  | 5    | 6    | 7    | 8   | 9  |    |
| Variation between FAD and FADH <sub>2</sub> states |      |      |      |     |    |    |
| 0%                                                 | 0%   | 0%   | 0%   | 0%  | 0% | 0% |
| -1%                                                | 0%   | 0%   | 0%   | 0%  | 0% | 0% |
| -24%                                               | -31% | -25% | -14% | -3% | 0% | 0% |
| 53%                                                | 34%  | 12%  | 3%   | 0%  | 0% | 0% |
| -17%                                               | -2%  | 1%   | 0%   | 0%  | 0% | 0% |
| 0%                                                 | 0%   | 0%   | 0%   | 0%  | 0% | 0% |
| 0%                                                 | 0%   | 0%   | 0%   | 0%  | 0% | 0% |
| 0%                                                 | 0%   | -1%  | 0%   | 0%  | 0% | 0% |
| 0%                                                 | 0%   | 0%   | 0%   | 0%  | 0% | 0% |
| 1%                                                 | 3%   | 4%   | 3%   | 0%  | 0% | 0% |
| 0%                                                 | 0%   | 0%   | 0%   | 0%  | 0% | 0% |
| 0%                                                 | 0%   | 0%   | 0%   | 0%  | 0% | 0% |
| 0%                                                 | 0%   | 0%   | 0%   | 0%  | 0% | 0% |
| 0%                                                 | 3%   | 6%   | -2%  | -2% | 0% | 0% |

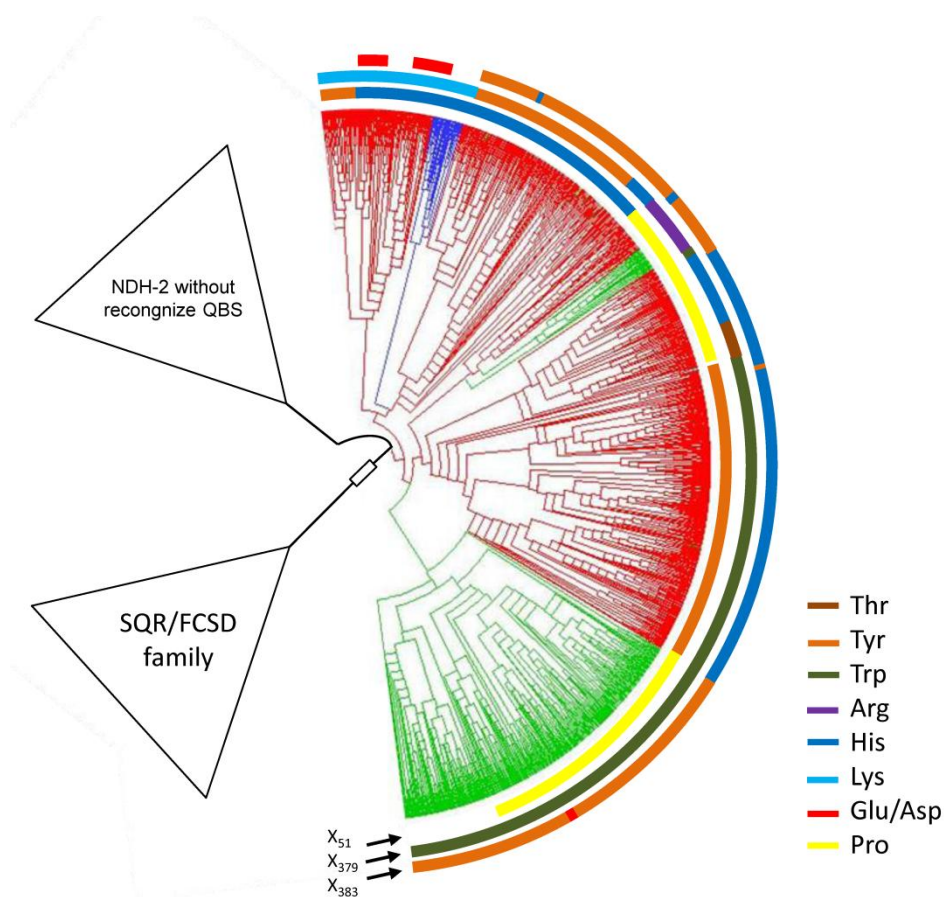

**Supplementary Figure 1: Distribution of the three amino acid residues involved in proton transfer from the 2<sup>nd</sup> dinucleotide binding domain to the quinone.** Neighbor-joining dendrogram of NDH-2s family was obtained using 2567 sequences from NDH-2s and sequences from SQRs/FCCDs to define the outer group, midpoint root, 1000 replicates of bootstrap, 999 generated seeds<sup>3</sup>. Branches are colored according to the three domains of life from which the organism containing the respective NDH-2 originates: green corresponds to organisms from Eukarya, red from Bacteria and blue from Archaea. The external ring of the dendrogram, in the region of NDH-2s, indicates the distribution of three amino acid residues proposed to be involved in proton transfer ( $X_{51}$ ,  $X_{379}$  and  $X_{383}$ ). Color code for amino acid residues is indicated in the figure.

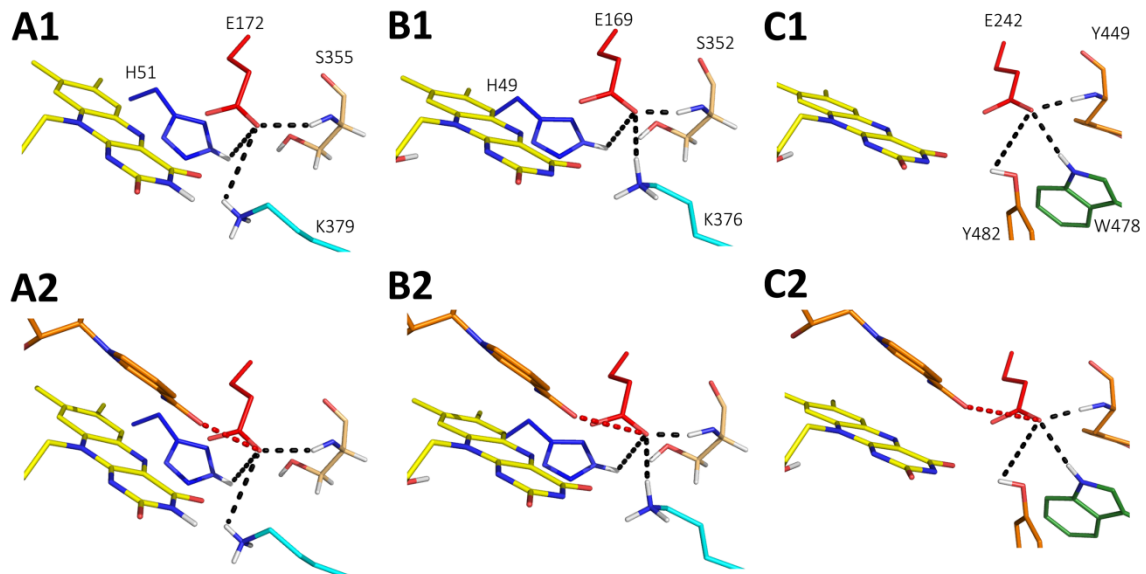

**Supplementary Figure 2: Role of glutamate residue ( $E_{172}$  in *S. aureus*) in the catalytic mechanism.** Cartoon representation of the X-ray crystal structure of NDH-2 from A) *S. aureus* (PDB:4XDB, <sup>4</sup>), B) *C. thermarum* (PDB:4NWZ, <sup>5</sup>) and C) *S. cerevisiae* (PDB:4G73, <sup>2</sup>). Dashed lines show possible hydrogen bonds established by the glutamate residue. A1)  $E_{172}$  in *S. aureus* may interact with  $H_{51}$ ,  $S_{355}$  or  $K_{379}$  when FAD is oxidized. B1)  $E_{169}$  in *C. thermarum* may establish interactions with  $H_{49}$ ,  $S_{352}$  or  $K_{376}$  when FAD is oxidized. C1)  $E_{242}$  in *S. cerevisiae* may interact with  $Y_{449}$ ,  $W_{478}$  or  $Y_{482}$  when FAD is oxidized. A2, B2, and C2) Upon binding of NADH,  $FADH_2-NAD^+$  complex is established and possibly a new hydrogen bond with  $NH_2$  from NADH is formed (red dash lines) and others disrupted (black dash line).

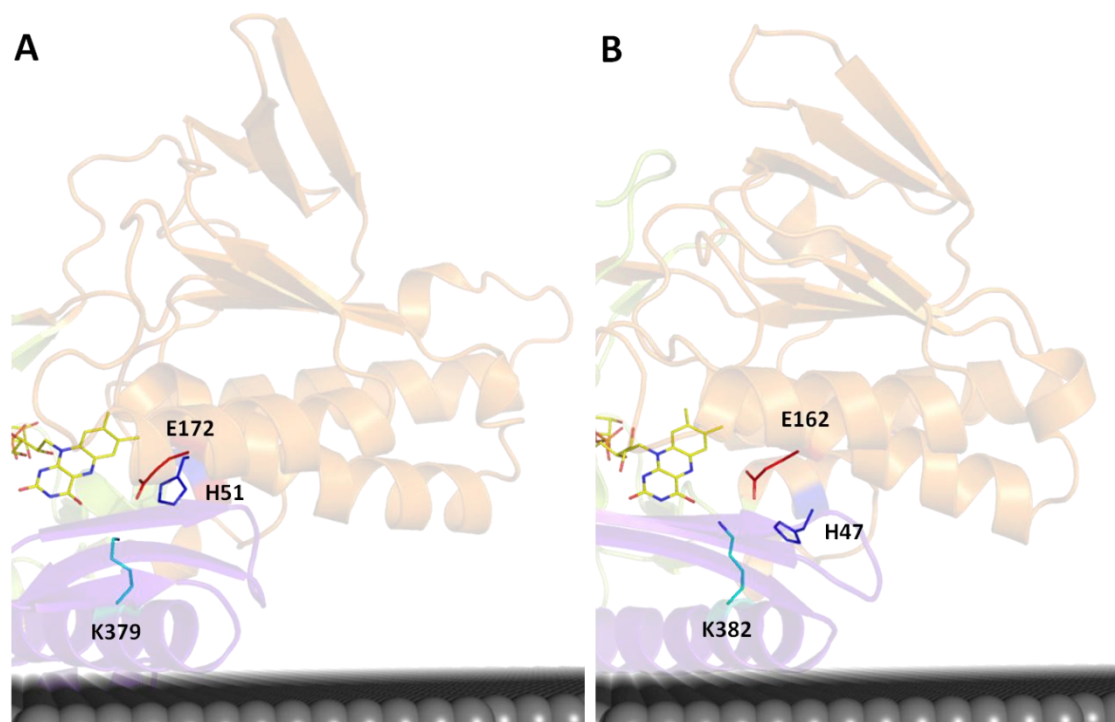

**Supplementary Figure 3: Comparison of the 2<sup>nd</sup> dinucleotide binding domain proton pathway in NDH-2s and SQRs:** Cartoon representation of the X-ray crystal structures of A) NDH-2 from *S. aureus* (PDB:4XDB, <sup>4</sup>) and B) SQR from *Aquifex aeolicus* (PDB:3HYW, <sup>6</sup>) (RMSD=3.2 Å). Residues E<sub>162</sub>, H<sub>47</sub> and K<sub>382</sub> occupy the same structural place in SQR as E<sub>172</sub>, H<sub>51</sub> and K<sub>379</sub> in NDH-2. Moreover, K<sub>382</sub> at X<sub>379</sub> equivalent position was suggested to be a proton donor to the quinone <sup>6-7</sup>. We observe that this lysine residue is at least 62 % conserved among SQRs <sup>3</sup>.



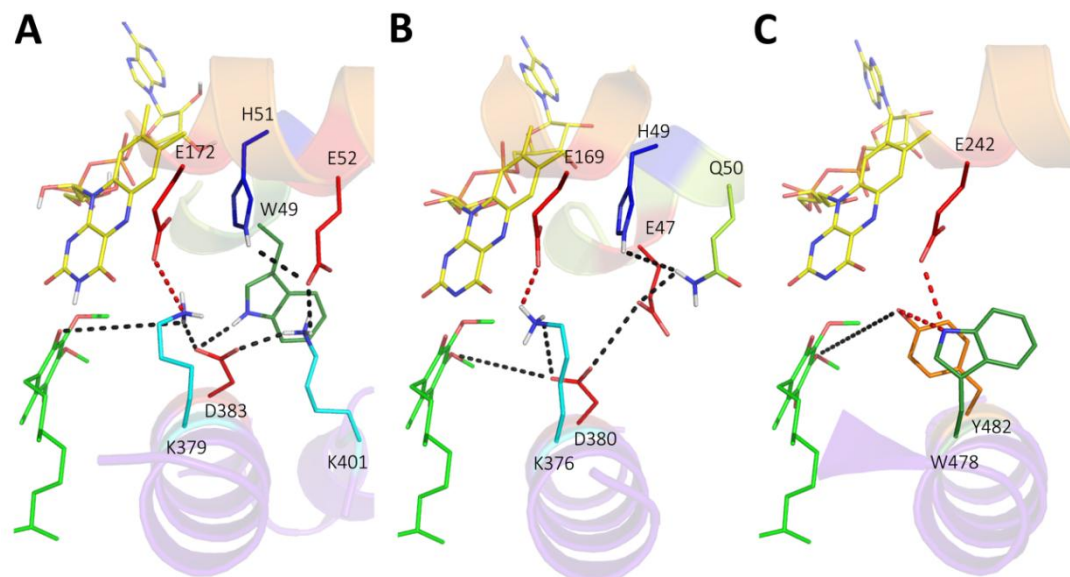

**Supplementary Figure 4: Proton conducting elements from NADH binding domain, X<sub>172</sub> (E<sub>172</sub>) to the quinone binding pocket.** Cartoon representation of the X-ray crystal structure of NDH-2 from A) *S. aureus* (PDB:4XDB, <sup>4</sup>), B) *C. thermarum* (PDB:4NWZ, <sup>5</sup>) and C) *S. cerevisiae* (PDB:4G73, <sup>2</sup>). Red dash lines represent direct proton transfer to X<sub>379</sub>/ X<sub>383</sub>. Black dash lines schematize alternative proton transfer to X<sub>379</sub>/ X<sub>383</sub> trough X<sub>51</sub>. A) In NDH-2 from *S. aureus*, E<sub>172</sub> could release a proton to K<sub>379</sub> or a proton could be transferred to the quinone binding pocket through H<sub>51</sub> to E<sub>52</sub> (~3.3 Å), E<sub>52</sub> to K<sub>401</sub> (~2.8 Å) and K<sub>401</sub> to D<sub>383</sub> (~2.4 Å). The latter seems to be stabilized by K<sub>379</sub> (~2.8 Å) and W<sub>49</sub> (~3.5 Å). B) In the case of NDH-2 from *C. thermarum*, H<sub>49</sub> (X<sub>51</sub>) can be linked via Q<sub>50</sub> (~3.9 Å), Q<sub>50</sub> to E<sub>47</sub> (~2.5 Å) and E<sub>47</sub> to D<sub>380</sub> (~3.8 Å). D<sub>380</sub> may be stabilized by K<sub>376</sub> at ~3.7 Å. C) For NDH-2 from *S. cerevisiae*, a proline is present at X<sub>51</sub>, and therefore we observed only one possible pathway through a hydrogen bond between E<sub>242</sub> and Y<sub>482</sub>.

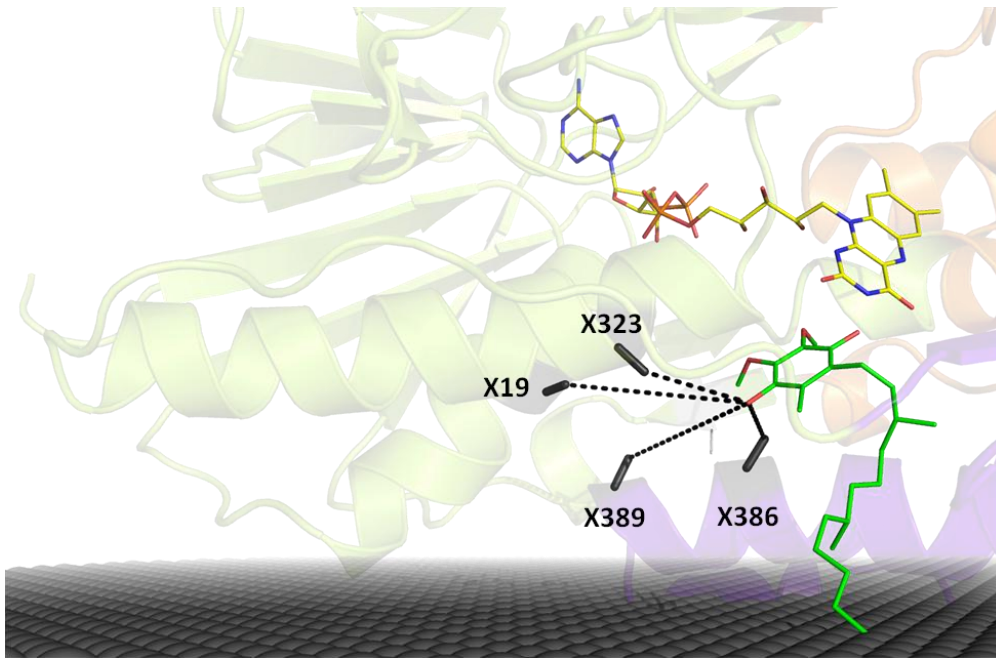

**Supplementary Figure 5: Schematic representation of residues which side chains may occupy the same structurally position of H<sub>397</sub> (X<sub>323</sub>) side chain.** The positions are: X<sub>19</sub> (*S. aureus*), located after the first conserved G<sub>12</sub>XGxxG<sub>17</sub> motif and which can be occupied by a lysine (3 %), an arginine (9 %), a tyrosine (14 %) or a glutamate (18 %); X<sub>323</sub> (*S. aureus*) which is a lysine (6 %), glutamate (8 %) or an histidine (17 %); X<sub>386</sub> or X<sub>389</sub>, which are located at the end of the first amphipathic  $\alpha$ -helix (Figure 1C) and may be occupied by a lysine residue (X<sub>389</sub> corresponding to K<sub>389</sub> in *S. aureus*, Figure 7A1) and a tyrosine (X<sub>386</sub>, corresponding to Y<sub>383</sub> in *C. thermarum*) (Figure 7B). We observed that 7 % of the NDH-2s have a lysine, an arginine, a histidine or a tyrosine residue at X<sub>389</sub>, but 58 % NDH-2s have these residues at X<sub>386</sub>.

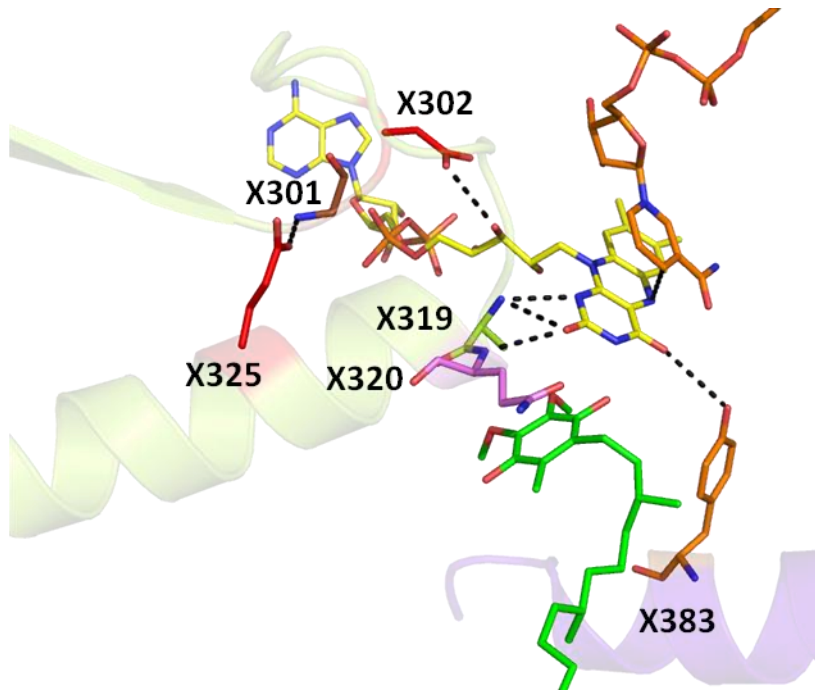

**Supplementary Figure 6: Schematic representation of the catalytic site indicating possible proton transfer in the presence of substrates.** Some of the residues involved in the stabilization of FAD (yellow), where dashed lines represent hydrogen bonds: backbone of X<sub>301</sub> (Glycine) interacts with X<sub>325</sub> (E/Q/H in *S. cerevisiae*, *S. aureus*, *C. thermarum*, respectively); X<sub>302</sub> (Aspartate) interacts with O3\* from FAD; backbones of X<sub>319</sub> and X<sub>320</sub> interact with N1 and O2 from FAD isoalloxazine ring; X<sub>379</sub>/X<sub>383</sub> (X<sub>379</sub> is a K in *S. aureus* and *C. thermarum* and X<sub>383</sub> is a Y in *S. cerevisiae*) interact with O4 from FAD isoalloxazine ring. Schemes based on the NDH-2 co-crystallized with NADH and quinone from *S. cerevisiae* (PDB:4G73<sup>2</sup>). X<sub>325</sub> may be considered as a critical residue in the propagation of the conformational changes from the GD motif to the QBS motif (caused by the FAD reduction, hence its bending), possibly necessary for the quinone protonation.

## References

- 1 Iwata, M. *et al.* The structure of the yeast NADH dehydrogenase (Ndi1) reveals overlapping binding sites for water- and lipid-soluble substrates. *Proceedings of the National Academy of Sciences of the United States of America* **109**, 15247-15252, doi:10.1073/pnas.1210059109 (2012).
- 2 Feng, Y. *et al.* Structural insight into the type-II mitochondrial NADH dehydrogenases. *Nature* **491**, 478-482, doi:10.1038/nature11541 (2012).
- 3 Marreiros, B. C., Sena, F. V., Sousa, F. M., Batista, A. P. & Pereira, M. M. Type II NADH:Quinone oxidoreductase family: Phylogenetic distribution, Structural diversity and Evolutionary divergences. *Environmental microbiology*, doi:10.1111/1462-2920.13352 (2016).
- 4 Sena, F. V. *et al.* Type-II NADH:quinone oxidoreductase from *Staphylococcus aureus* has two distinct binding sites and is rate limited by quinone reduction. *Molecular microbiology* **98**, 272-288, doi:10.1111/mmi.13120 (2015).
- 5 Heikal, A. *et al.* Structure of the bacterial type II NADH dehydrogenase: a monotopic membrane protein with an essential role in energy generation. *Molecular microbiology* **91**, 950-964, doi:10.1111/mmi.12507 (2014).
- 6 Marcia, M., Ermler, U., Peng, G. & Michel, H. The structure of *Aquifex aeolicus* sulfide:quinone oxidoreductase, a basis to understand sulfide detoxification and respiration. *Proceedings of the National Academy of Sciences of the United States of America* **106**, 9625-9630, doi:10.1073/pnas.0904165106 (2009).
- 7 Cherney, M. M., Zhang, Y., Solomonson, M., Weiner, J. H. & James, M. N. Crystal structure of sulfide:quinone oxidoreductase from *Acidithiobacillus ferrooxidans*: insights into sulfidotrophic respiration and detoxification. *Journal of molecular biology* **398**, 292-305, doi:10.1016/j.jmb.2010.03.018 (2010).
